# Supplementary material for: Identification of New Substrates and Inhibitors of Human CYP2A7
Source: MDPI journal article supplement (doi:10.3390/molecules29102191), 2024-05-08
Supplement: s1 [file s1]

## Supplemental Informations

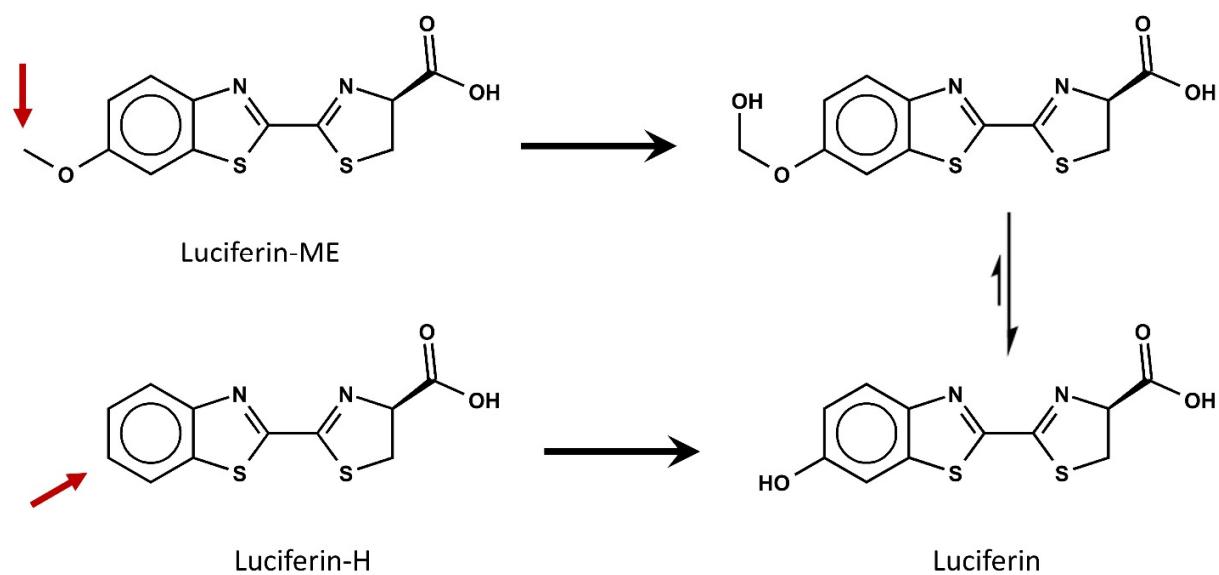

**Figure S1:** Scheme of the conversion of Luciferin-H and Luciferin-ME into D-luciferin. Red arrows indicate sites of oxidation by CYP enzymes that yield products for bioluminescent CYP activity detection.

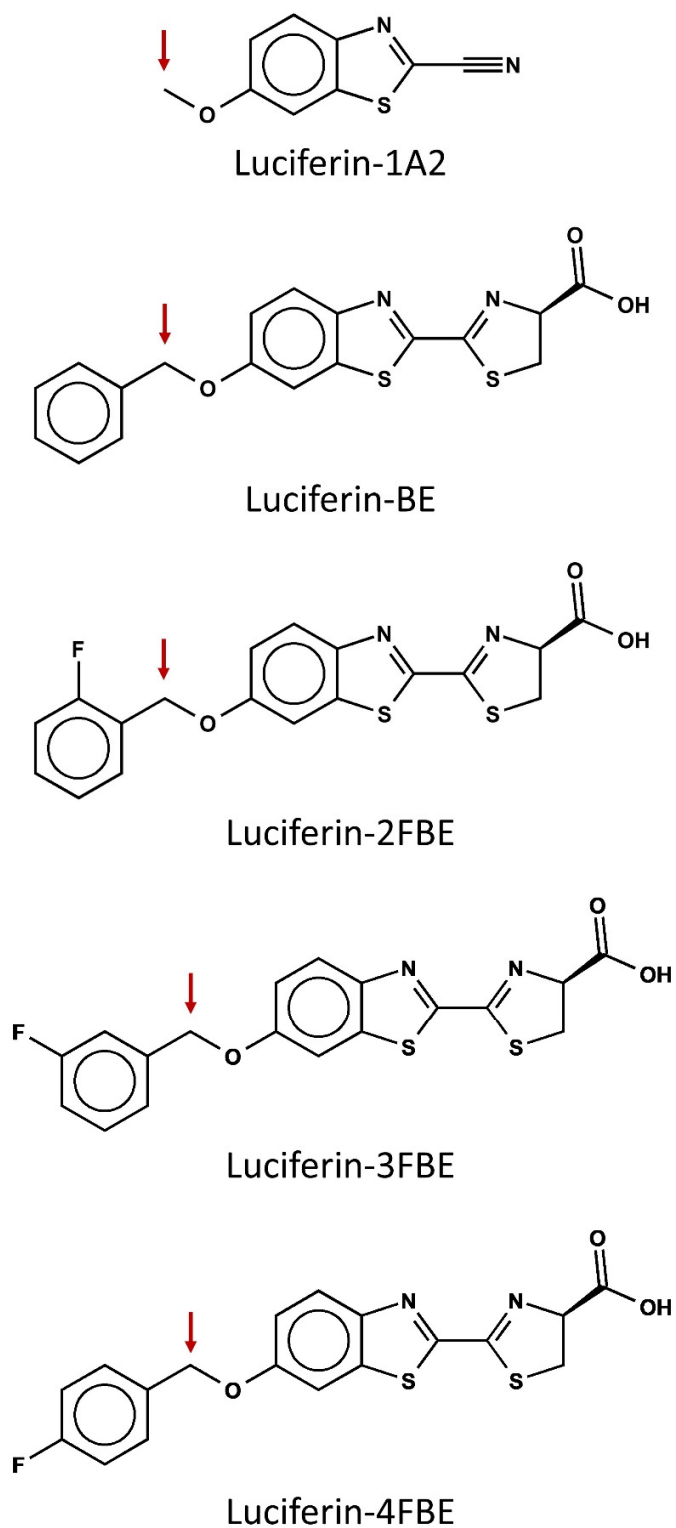

**Figure S2:** Chemical structures of the other proluciferin substrates used in this study. Red arrows indicate sites of oxidation by CYP enzymes that yield products for bioluminescent CYP activity detection.

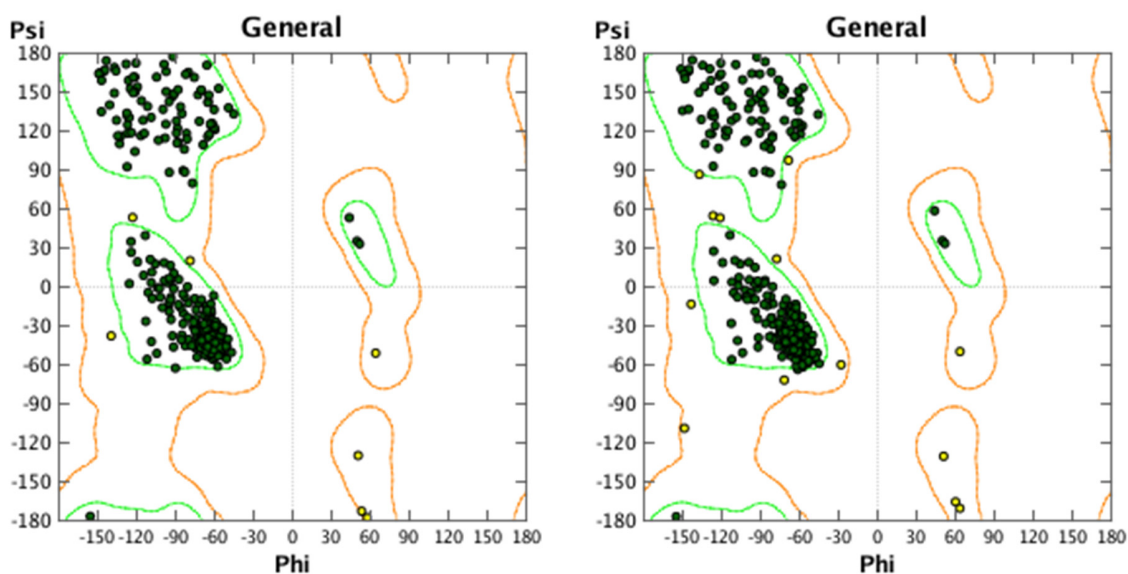

**Figure S3:** Ramachandran (phi-psi) plot of AlphaFold2-predicted structures of CYP2A7-WT (left) and CYP2A7 \*1 (right). No outlier was shown in any of the structures.

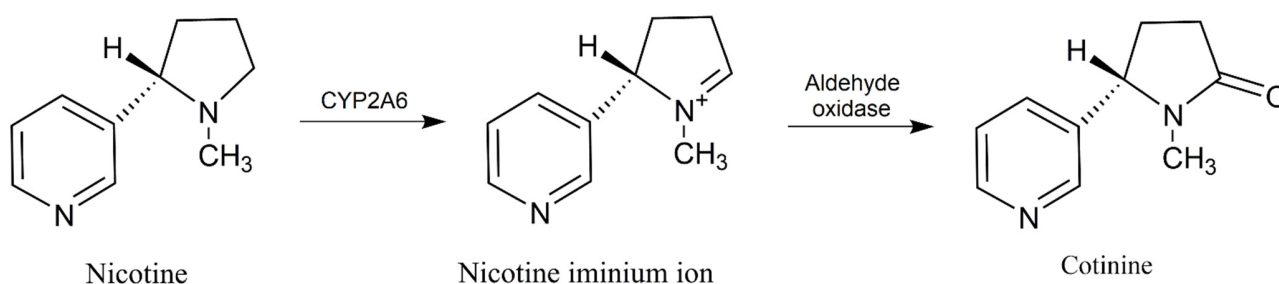

**Figure S4:** Scheme of the conversion of nicotine via the nicotine iminium ion to cotinine.

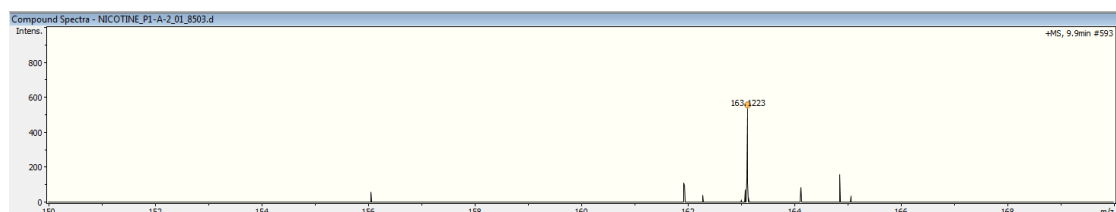

**Figure S5:** Mass Peak (ESI-QTOF-LCMS) of nicotine. The LC-MS system was operated in positive electrospray ionization mode at a capillary voltage of 4.5 kV.

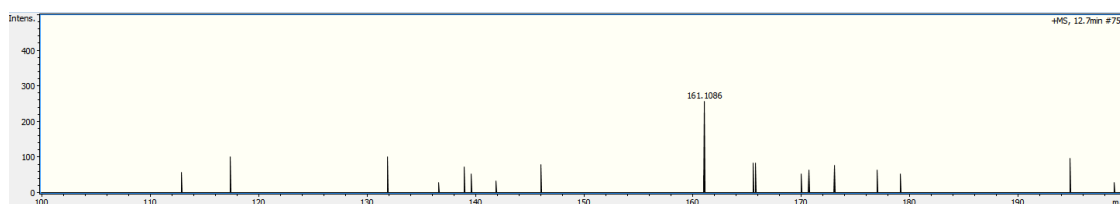

**Figure S6:** Mass Peak (ESI-QTOF-LCMS) of the nicotine iminium ion. The LC-MS system was operated in positive electrospray ionization mode at a capillary voltage of 4.5 kV.

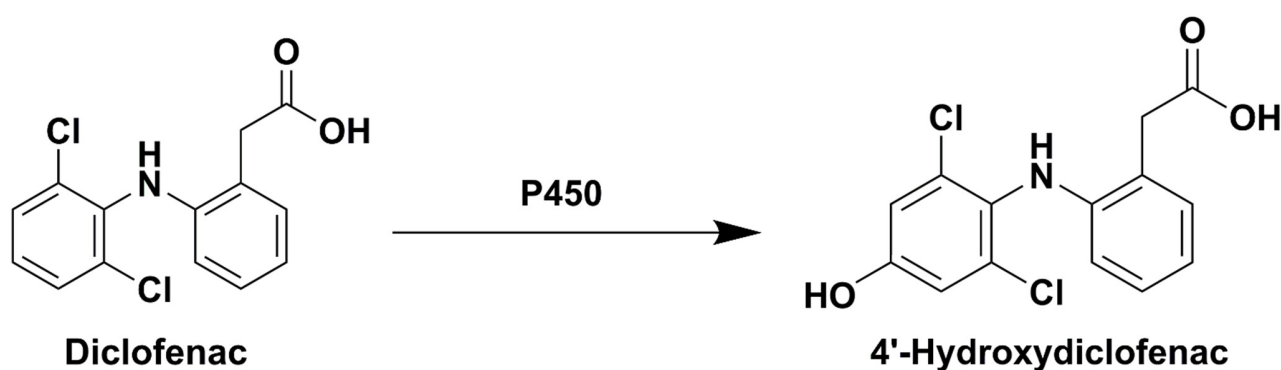

**Figure S7:** Scheme of the 4'-hydroxylation of diclofenac.

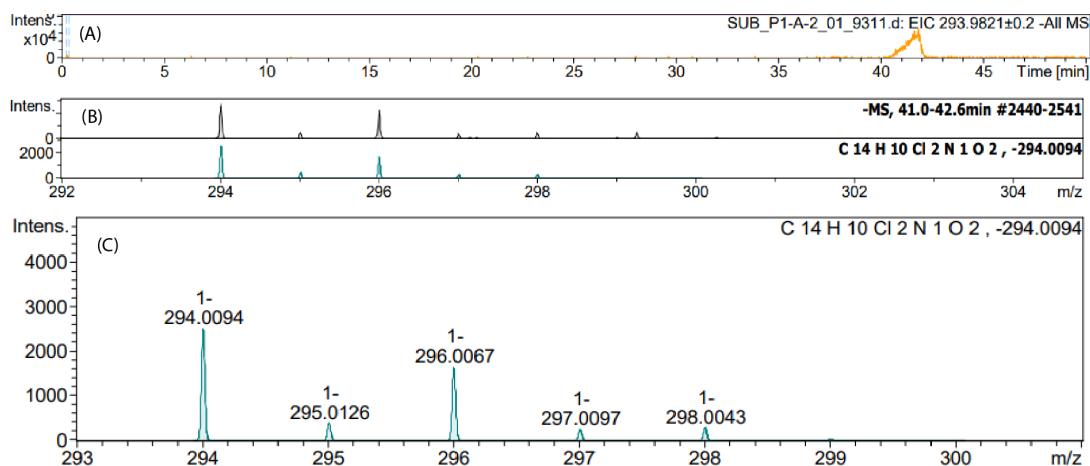

**Figure S8:** (A) Extracted ion chromatogram (LCMS-QTOF) of diclofenac (substrate). (B, C) Extract of the masses at a retention time 41.8 minutes. The LC-MS system was operated in negative electrospray ionization mode at a capillary voltage of 3.0 kV.

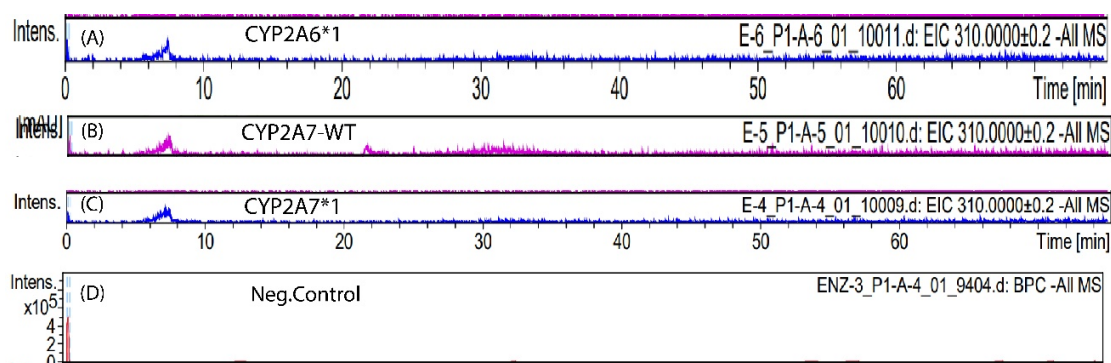

**Figure S9:** Extracted ion chromatograms (ESI-QTOF-LCMS) of hydroxydiclofenac by (A) CYP2A6\*1, (B) CYP2A7-WT, and (C) CYP2A7-MT. (D) Negative control was strain CAD-62 (CPR only). The LC-MS system was operated in negative electrospray ionization mode at a capillary voltage of 4.5 kV.

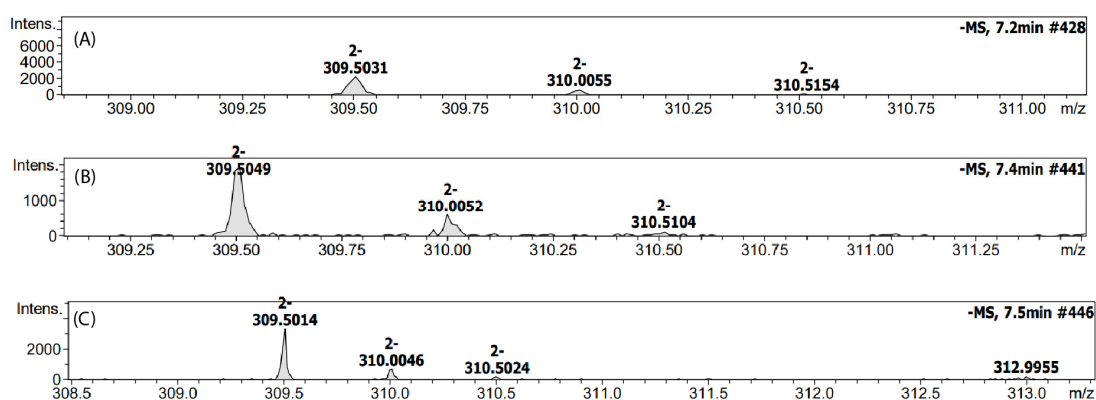

**Figure S10:** ESI-QTOF-LCMS chromatogram of hydroxydiclofenac produced by (A) CYP2A6\*1 (B) CYP2A7-WT (C) CYP2A7\*1. The LC-MS system was operated in negative electrospray ionization mode at a capillary voltage of 4.5 kV.

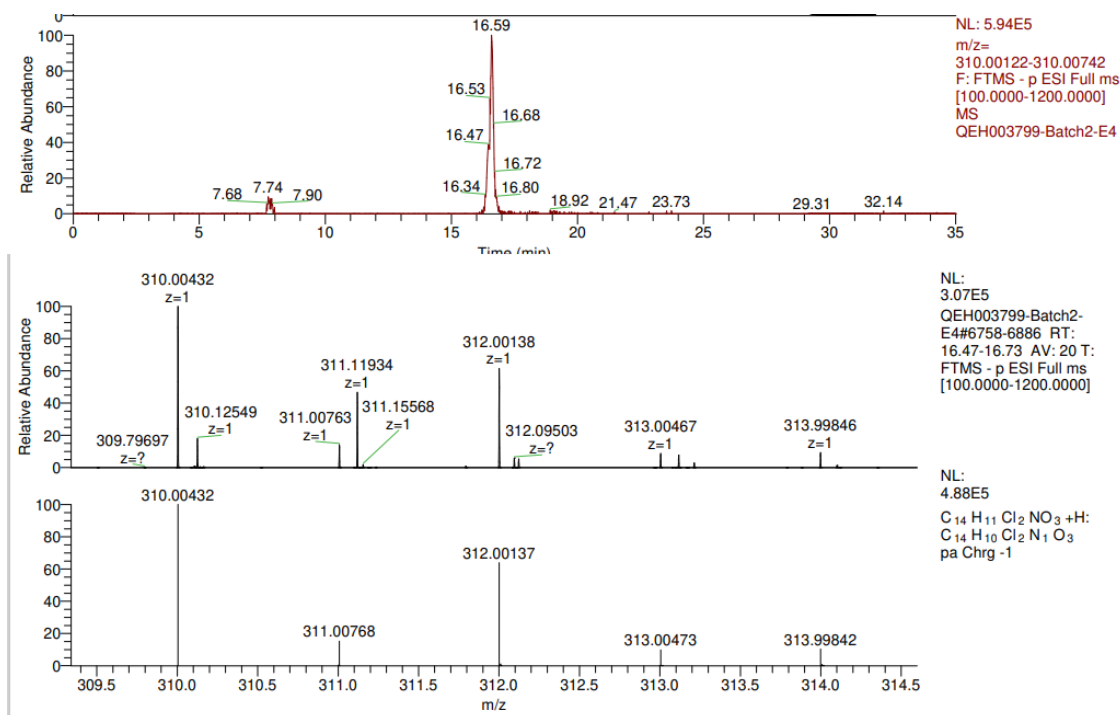

**Figure S11:** Extracted ion chromatogram (LC-QE-MS,  $[M-H]^-$ ) of hydroxydiclofenac produced by enzyme bags of strain RAJ122 (expressing both CYP2A6\*1 and human CPR). The reaction product ( $C_{14}H_{10}Cl_2N_1O_3$ ) was detected at 16.59 minutes  $[M-H]^- = 310.0043$  Da (bottom).

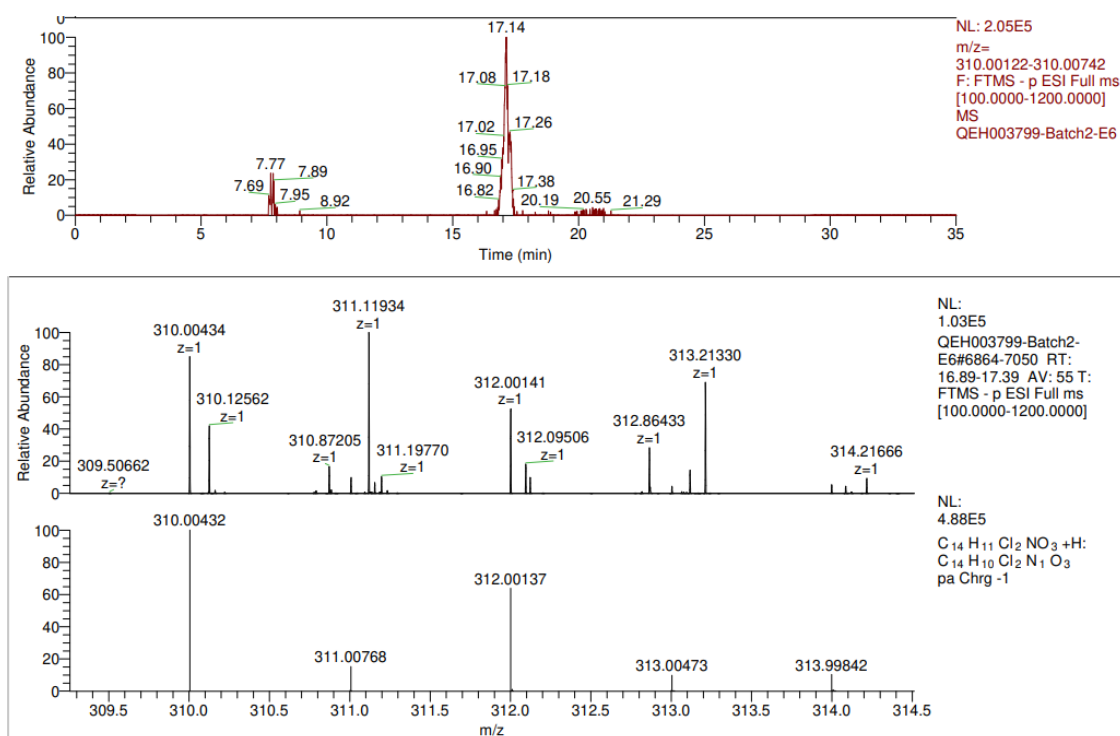

**Figure S12:** Extracted ion chromatogram (LC-QE-MS,  $[M-H]^-$ ) of hydroxydiclofenac produced by enzyme bags of strain RAJ127 (expressing both CYP2A7\*1 and human CPR). The reaction product ( $C_{14}H_{10}Cl_2N_1O_3$ ) was detected at 17.14 minutes  $[M-H]^- = 310.0043$  Da (bottom).

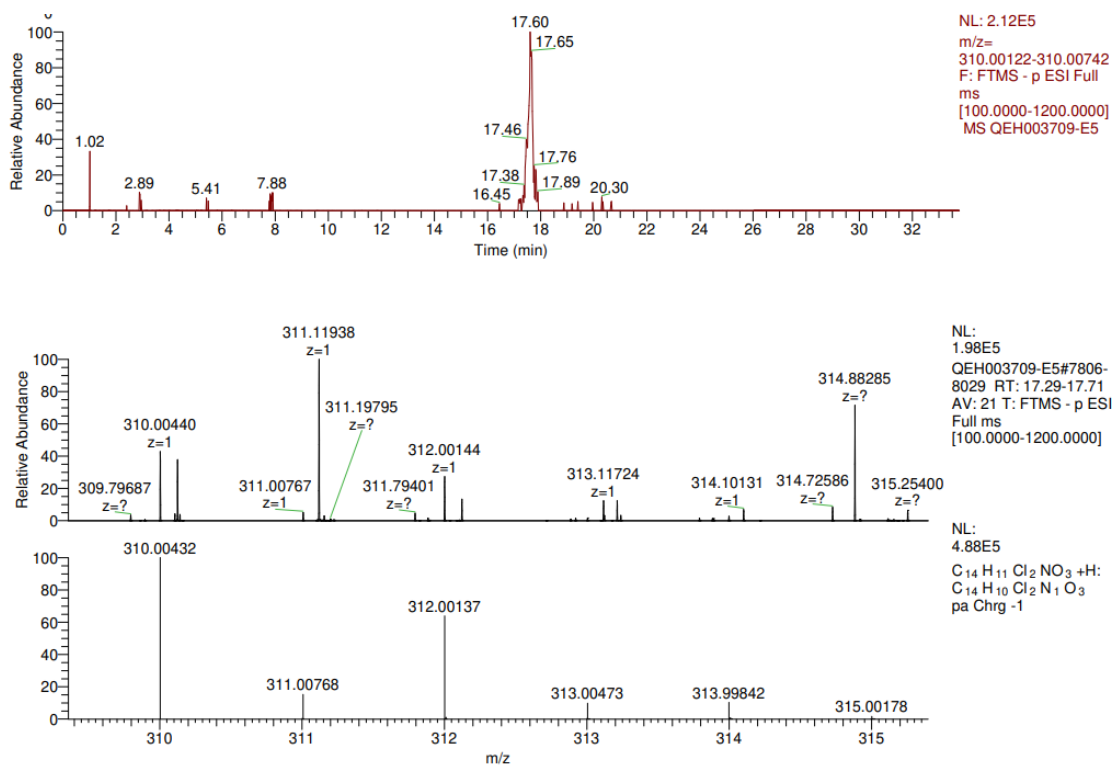

**Figure S13:** Extracted ion chromatogram (LC-QE-MS,  $[M-H]^-$ ) of hydroxydiclofenac produced by enzyme bags of strain AA01 (expressing both CYP2A7-WT and human CPR). The reaction product ( $C_{14}H_{10}Cl_2N_1O_3$ ) was detected at 17.60 minutes  $[M-H]^- = 310.0043$  Da (bottom).

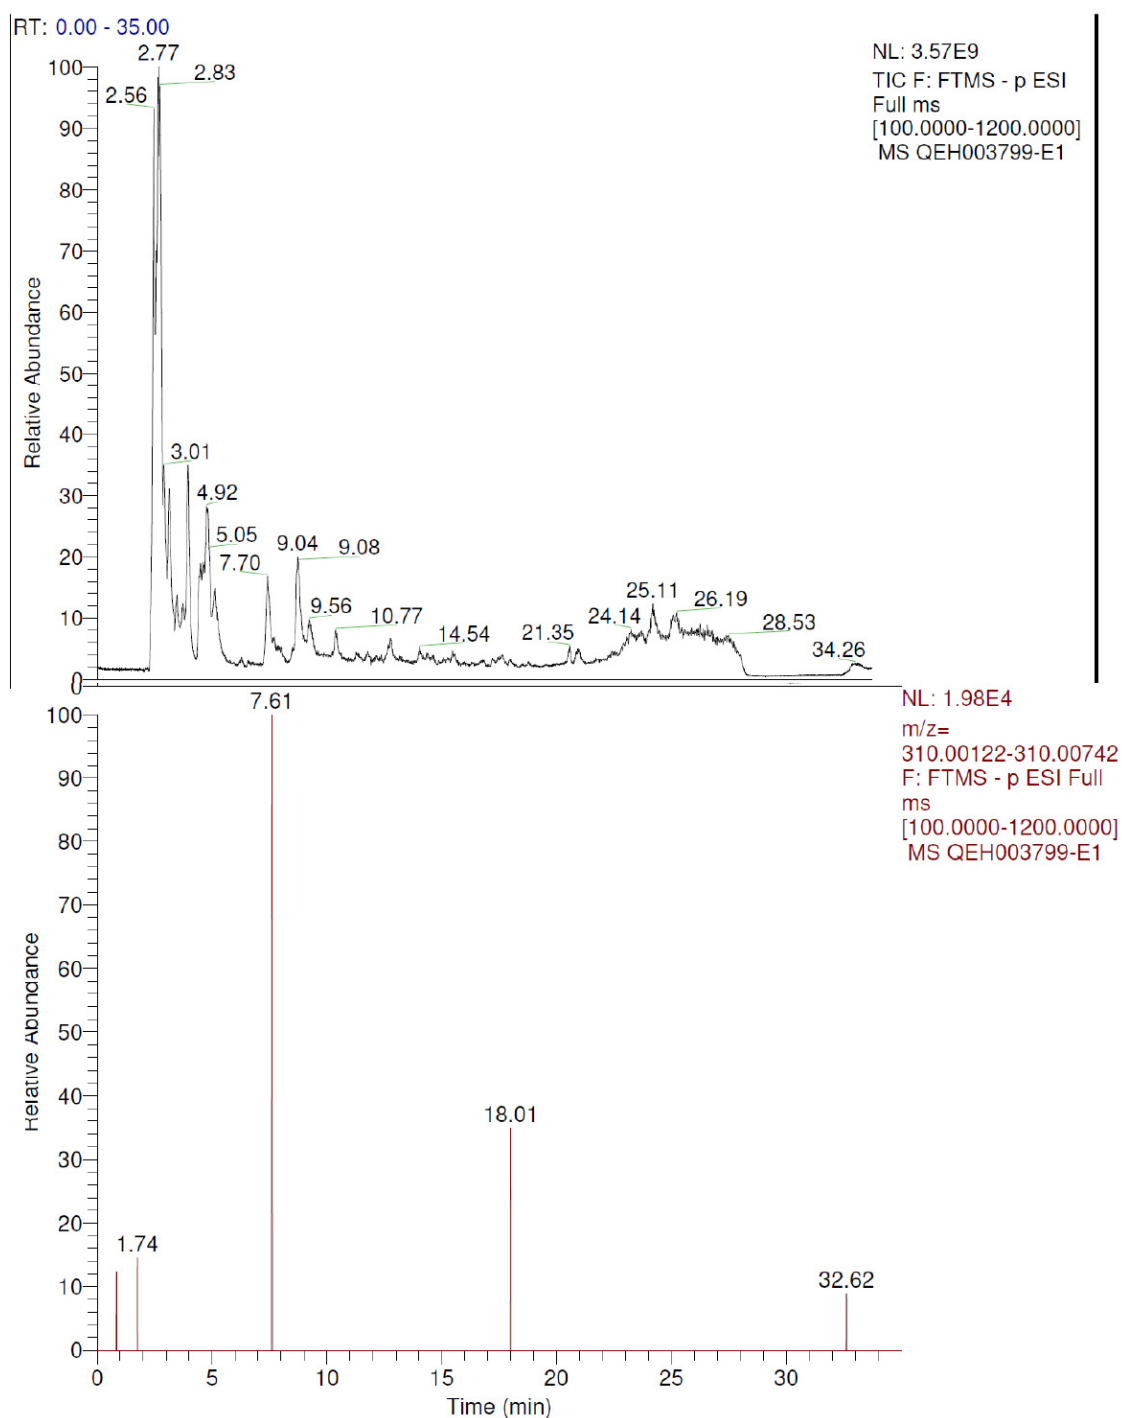

**Figure S14:** Extracted ion chromatogram (LC-QE-MS,  $[M-H]^-$ ) of strain CAD62 (negative control; expressing only human CPR) showing no product formation upon incubation with diclofenac.



**Table S1:** Analytical data (LC/MS-QTOF) for the diclofenac metabolite found in this study

| Enzyme    | Metabolite        | Formula                                                         | Retention time<br>(min) | Expected<br>mass m/z<br>[M-H] <sup>-</sup> | Observed mass<br>m/z<br>[M-H] <sup>-</sup> | Difference<br>$\Delta$ m/z |
|-----------|-------------------|-----------------------------------------------------------------|-------------------------|--------------------------------------------|--------------------------------------------|----------------------------|
| CYP2A6*1  | Hydroxydiclofenac | C <sub>14</sub> H <sub>11</sub> Cl <sub>2</sub> NO <sub>3</sub> | 7.2                     | 310.0038                                   | 310.0055                                   | 5.5                        |
| CYP2A7-WT |                   |                                                                 | 7.4                     |                                            | 310.0052                                   | 4.5                        |
| CYP2A7*1  |                   |                                                                 | 7.5                     |                                            | 310.0046                                   | 2.6                        |

**Table S2:** Analytical data (LC/MS-QTOF) for diclofenac (substrate) detected in this study

| Compound   | Isotope peak                      | Formula                                                         | Retention time<br>(min) | Expected<br>mass m/z<br>[M-H] <sup>-</sup> | Observed mass<br>m/z<br>[M-H] <sup>-</sup> | Difference<br>$\Delta$ m/z |
|------------|-----------------------------------|-----------------------------------------------------------------|-------------------------|--------------------------------------------|--------------------------------------------|----------------------------|
| Diclofenac | Base peak                         | C <sub>14</sub> H <sub>11</sub> Cl <sub>2</sub> NO <sub>2</sub> | 41.8                    | 294.0089                                   | 294.0094                                   | 1.7                        |
|            | 1 <sup>st</sup> Monoisotopic peak |                                                                 | 41.8                    | 296.0061                                   | 296.0067                                   | 2.0                        |
|            | 2 <sup>nd</sup> Monoisotopic peak |                                                                 | 41.8                    | 295.0121                                   | 295.0126                                   | 1.7                        |

**Table S3:** Analytical data (LC-MS/MS-QE) for the diclofenac metabolite found in this study

| Enzyme    | Metabolite        | Formula                                                         | Retention time<br>(min) | Expected<br>mass m/z<br>[M-H] <sup>-</sup> | Observed mass<br>m/z<br>[M-H] <sup>-</sup> | Difference<br>$\Delta$ m/z |
|-----------|-------------------|-----------------------------------------------------------------|-------------------------|--------------------------------------------|--------------------------------------------|----------------------------|
| CYP2A6*1  | Hydroxydiclofenac | C <sub>14</sub> H <sub>11</sub> Cl <sub>2</sub> NO <sub>3</sub> | 16.47                   | 310.0038                                   | 310.0043                                   | 1.6                        |
| CYP2A7-WT |                   |                                                                 | 17.60                   |                                            | 310.0043                                   | 1.6                        |
| CYP2A7*1  |                   |                                                                 | 17.14                   |                                            | 310.0043                                   | 1.6                        |
